# Supplementary material for: Insights into the respiratory tract microbiota of patients with cystic fibrosis during early Pseudomonas aeruginosa colonization
Source: PubMed Central journal article supplement (PMC4529844; doi:10.1186/s40064-015-1207-0), 2015-08-09

a)

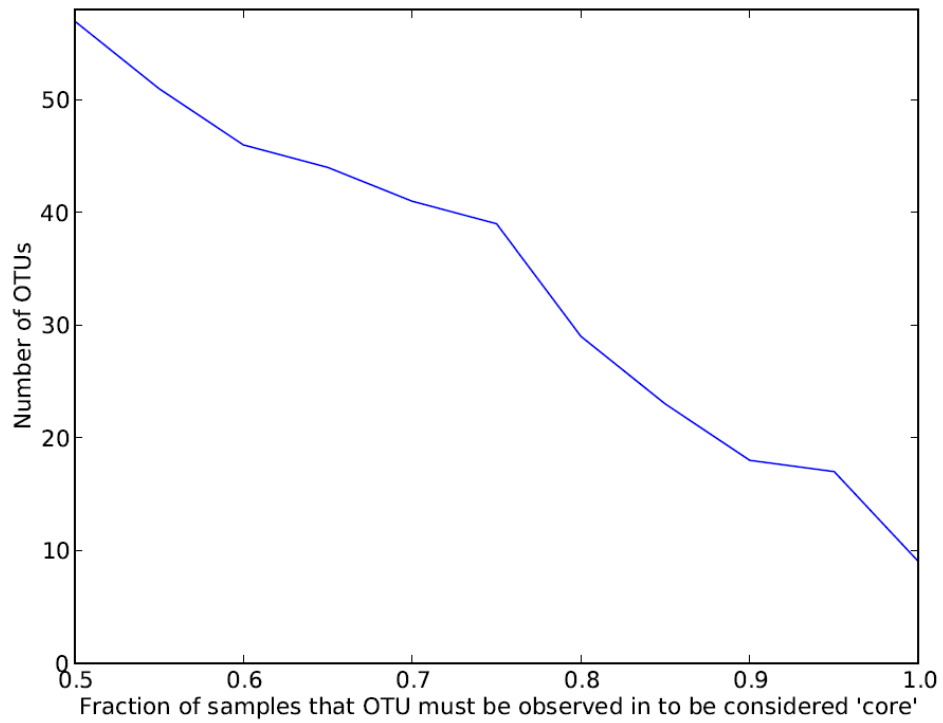

b)

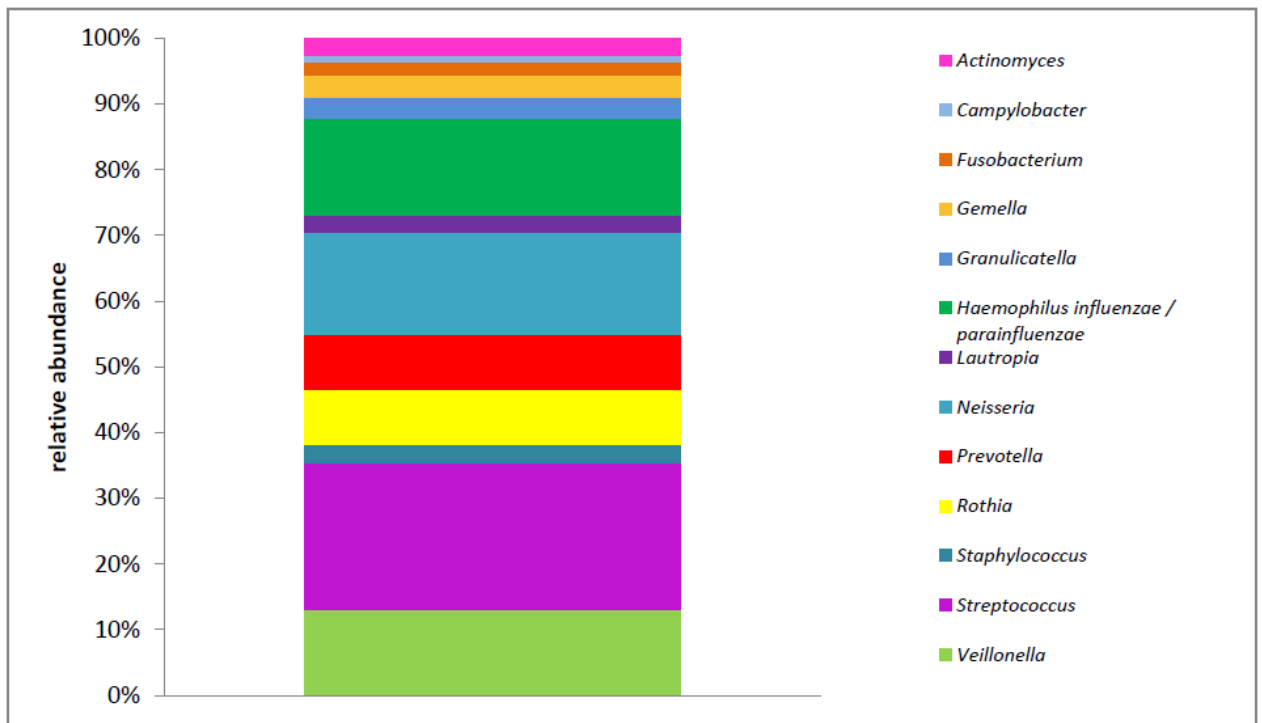

Supplement: 40064_2015_1207_MOESM4_ESM.pdf [file 40064_2015_1207_MOESM4_ESM.pdf]
