# Supplementary material for: Insights into the respiratory tract microbiota of patients with cystic fibrosis during early Pseudomonas aeruginosa colonization
Source: PubMed Central journal article supplement (PMC4529844; doi:10.1186/s40064-015-1207-0), 2015-08-09
Supplement: 40064_2015_1207_MOESM6_ESM.pdf [file 40064_2015_1207_MOESM6_ESM.pdf]

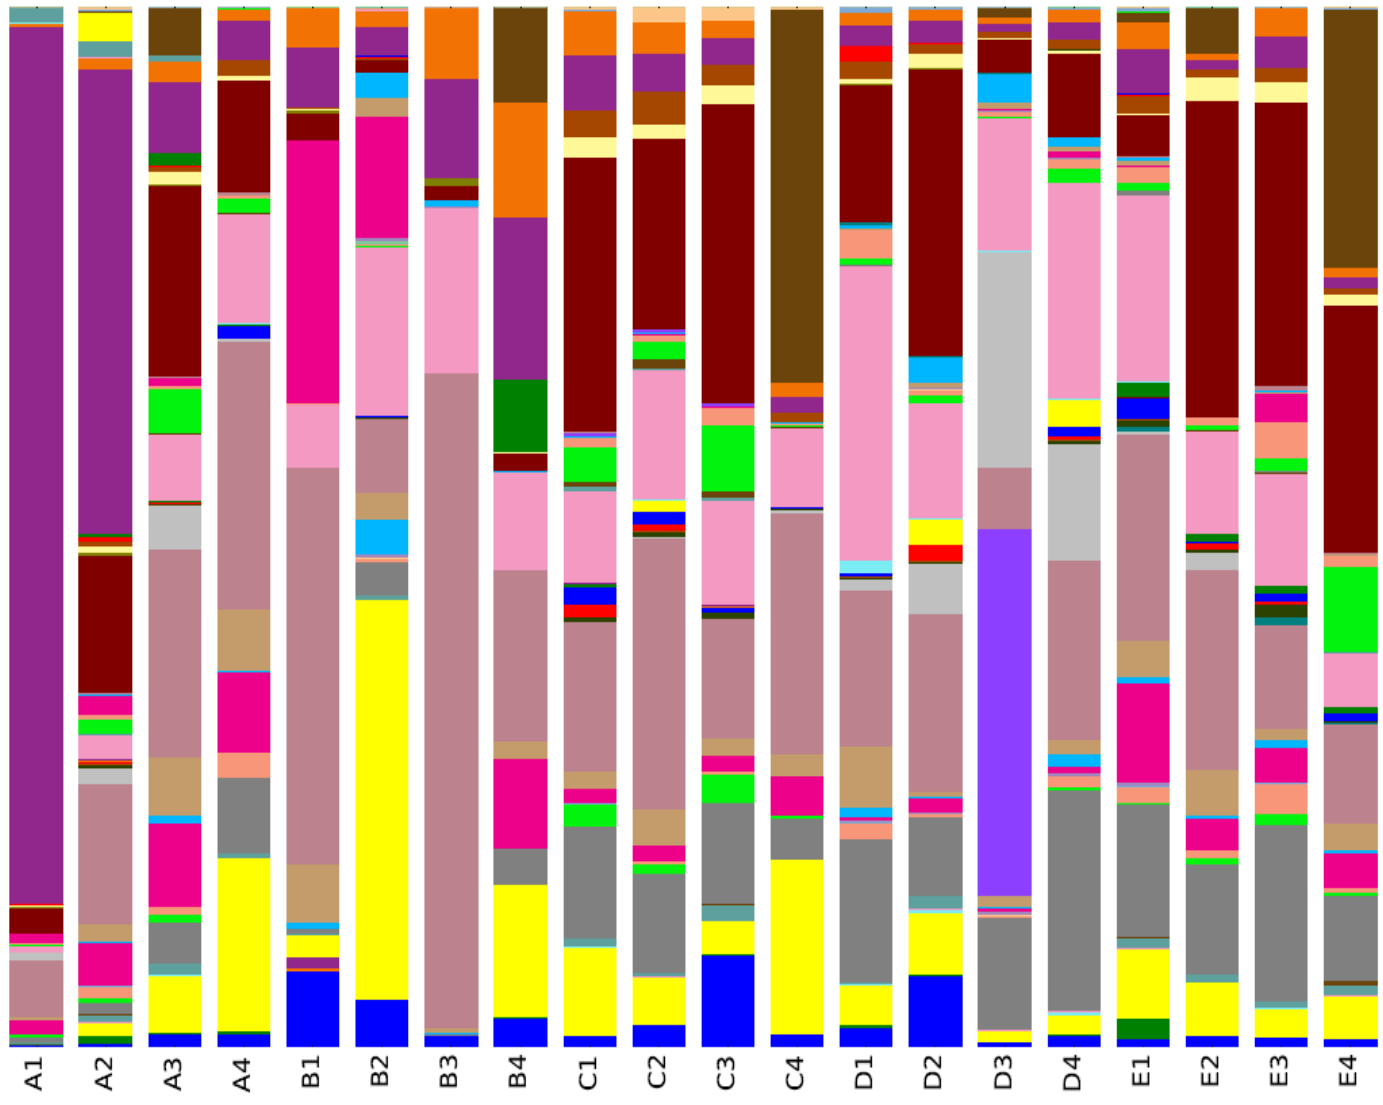

k\_Bacteria;p\_Acidobacteria;c\_Acidobacteria-6;o\_f\_g\_

k\_Bacteria;p\_Actinobacteria;c\_Actinobacteria;o\_Actinomycetales;f\_Actinomycetaceae;g\_Actinomyces

k\_Bacteria;p\_Actinobacteria;c\_Actinobacteria;o\_Actinomycetales;f\_Brevibacteriaceae;g\_Brevibacterium

k\_Bacteria;p\_Actinobacteria;c\_Actinobacteria;o\_Actinomycetales;f\_Corynebacteriaceae;g\_Corynebacterium

k\_Bacteria;p\_Actinobacteria;c\_Actinobacteria;o\_Actinomycetales;f\_Micrococcaceae;g\_Kocuria

k\_Bacteria;p\_Actinobacteria;c\_Actinobacteria;o\_Actinomycetales;f\_Micrococcaceae;g\_Rothia

k\_Bacteria;p\_Actinobacteria;c\_Actinobacteria;o\_Bifidobacteriales;f\_Bifidobacteriaceae;g\_Scardovia

k\_Bacteria;p\_Actinobacteria;c\_Coriobacteriia;o\_Coriobacteriales;f\_Coriobacteriaceae;g\_Atopobium

k\_Bacteria;p\_Bacteroidetes;c\_Bacteroidia;o\_Bacteroidales;f\_Porphyromonadaceae;g\_Porphyromonas

k\_Bacteria;p\_Bacteroidetes;c\_Bacteroidia;o\_Bacteroidales;f\_Porphyromonadaceae;g\_Tannerella

k\_Bacteria;p\_Bacteroidetes;c\_Bacteroidia;o\_Bacteroidales;f\_Prevotellaceae;g\_Prevotella

k\_Bacteria;p\_Bacteroidetes;c\_Bacteroidia;o\_Bacteroidales;f\_Paraprevotellaceae;g\_Prevotella

k\_Bacteria;p\_Bacteroidetes;c\_Flavobacteriia;o\_Flavobacteriales;f\_Flavobacteriaceae;g\_Capnocytophaga

k\_Bacteria;p\_Bacteroidetes;c\_Flavobacteriia;o\_Flavobacteriales;f\_Flavobacteriaceae;g\_Capnocytophaga

k\_Bacteria;p\_Bacteroidetes;c\_Flavobacteriia;o\_Flavobacteriales;f\_Weeksellaceae;g\_

k\_Bacteria;p\_Bacteroidetes;c\_Sphingobacteriia;o\_Sphingobacteriales;f\_g\_

k\_Bacteria;p\_Bacteroidetes;c\_Saprosirae;o\_Saprosirales;f\_Chitinophagaceae;g\_

k\_Bacteria;p\_Bacteroidetes;c\_Saprosirae;o\_Saprosirales;f\_Chitinophagaceae;g\_Sediminibacterium

k\_Bacteria;p\_Cyanobacteria;c\_4C0d-2;o\_MLE1-12;f\_g\_

k\_Bacteria;p\_Firmicutes;c\_Bacilli;o\_Gemellales;f\_Gemellaceae;g\_Gemella

k\_Bacteria;p\_Firmicutes;c\_Bacilli;o\_Lactobacillales;f\_Aerococcaceae;g\_

k\_Bacteria;p\_Firmicutes;c\_Bacilli;o\_Lactobacillales;f\_Carnobacteriaceae;g\_Granulicatella

k\_Bacteria;p\_Firmicutes;c\_Bacilli;o\_Lactobacillales;f\_Leuconostocaceae;g\_Leuconostoc

k\_Bacteria;p\_Firmicutes;c\_Bacilli;o\_Lactobacillales;f\_Streptococcaceae;g\_Lactococcus

k\_Bacteria;p\_Firmicutes;c\_Bacilli;o\_Lactobacillales;f\_Streptococcaceae;g\_Streptococcus

k\_Bacteria;p\_Firmicutes;c\_Bacilli;Other;Other;Other

k\_Bacteria;p\_Firmicutes;c\_Clostridia;o\_Clostridiales;f\_g\_

k\_Bacteria;p\_Firmicutes;c\_Clostridia;o\_Clostridiales;f\_Lachnospiraceae;g\_

k\_Bacteria;p\_Firmicutes;c\_Clostridia;o\_Clostridiales;f\_Lachnospiraceae;g\_Catonella

k\_Bacteria;p\_Firmicutes;c\_Clostridia;o\_Clostridiales;f\_Lachnospiraceae;g\_Moryella

k\_Bacteria;p\_Firmicutes;c\_Clostridia;o\_Clostridiales;f\_Lachnospiraceae;g\_Oribacterium

k\_Bacteria;p\_Firmicutes;c\_Clostridia;o\_Clostridiales;f\_Lachnospiraceae;Other

k\_Bacteria;p\_Firmicutes;c\_Clostridia;o\_Clostridiales;f\_Peptostreptococcaceae;g\_

k\_Bacteria;p\_Firmicutes;c\_Clostridia;o\_Clostridiales;f\_Peptostreptococcaceae;g\_Peptostreptococcus

k\_Bacteria;p\_Firmicutes;c\_Clostridia;o\_Clostridiales;f\_Veillonellaceae;g\_Dialister

k\_Bacteria;p\_Firmicutes;c\_Clostridia;o\_Clostridiales;f\_Veillonellaceae;g\_Megasphaera

k\_Bacteria;p\_Firmicutes;c\_Clostridia;o\_Clostridiales;f\_Veillonellaceae;g\_Selenomonas

k\_Bacteria;p\_Firmicutes;c\_Clostridia;o\_Clostridiales;f\_Veillonellaceae;g\_Veillonella

k\_Bacteria;p\_Firmicutes;c\_Clostridia;o\_Clostridiales;f\_Mogibacteriaceae;g\_

k\_Bacteria;p\_Firmicutes;c\_Clostridia;o\_Clostridiales;f\_Mogibacteriaceae;g\_Mogibacterium

k\_Bacteria;p\_Firmicutes;c\_Clostridia;o\_Clostridiales;f\_Tissierellaceae;g\_Parvimonas

k\_Bacteria;p\_Fusobacteria;c\_Fusobacteriia;o\_Fusobacteriales;f\_Fusobacteriaceae;g\_Fusobacterium

k\_Bacteria;p\_Fusobacteria;c\_Fusobacteriia;o\_Fusobacteriales;f\_Leptotrichiaceae;g\_Leptotrichia

k\_Bacteria;p\_Proteobacteria;c\_Alphaproteobacteria;o\_Caulobacterales;f\_Caulobacteraceae;g\_Brevundimonas

k\_Bacteria;p\_Proteobacteria;c\_Alphaproteobacteria;o\_Caulobacterales;f\_Caulobacteraceae;g\_Caulobacter

k\_Bacteria;p\_Proteobacteria;c\_Alphaproteobacteria;o\_Rhizobiales;f\_Bradyrhizobiaceae;g\_Aflpia

k\_Bacteria;p\_Proteobacteria;c\_Alphaproteobacteria;o\_Sphingomonadales;f\_Sphingomonadaceae;g\_Sphingomonas

k\_Bacteria;p\_Proteobacteria;c\_Betaproteobacteria;o\_Burkholderiales;f\_Burkholderiaceae;g\_Burkholderia

k\_Bacteria;p\_Proteobacteria;c\_Betaproteobacteria;o\_Burkholderiales;f\_Burkholderiaceae;g\_Lautropia

k\_Bacteria;p\_Proteobacteria;c\_Betaproteobacteria;o\_Burkholderiales;f\_Comamonadaceae;g\_Curvibacter

k\_Bacteria;p\_Proteobacteria;c\_Betaproteobacteria;o\_Burkholderiales;f\_Comamonadaceae;Other

k\_Bacteria;p\_Proteobacteria;c\_Betaproteobacteria;o\_Neisseriales;f\_Neisseriaceae;g\_

k\_Bacteria;p\_Proteobacteria;c\_Betaproteobacteria;o\_Neisseriales;f\_Neisseriaceae;g\_Eikenella

k\_Bacteria;p\_Proteobacteria;c\_Betaproteobacteria;o\_Neisseriales;f\_Neisseriaceae;g\_Kingella

k\_Bacteria;p\_Proteobacteria;c\_Betaproteobacteria;o\_Neisseriales;f\_Neisseriaceae;g\_Neisseria

k\_Bacteria;p\_Proteobacteria;c\_Betaproteobacteria;o\_Neisseriales;f\_Neisseriaceae;Other

k\_Bacteria;p\_Proteobacteria;c\_Betaproteobacteria;Other;Other;Other

k\_Bacteria;p\_Proteobacteria;c\_Deltaproteobacteria;o\_Myxococcales;f\_0319-6G20;g\_

k\_Bacteria;p\_Proteobacteria;c\_Epsilonproteobacteria;o\_Campylobacteriales;f\_Campylobacteraceae;g\_Campylobacter

k\_Bacteria;p\_Proteobacteria;c\_Epsilonproteobacteria;o\_Campylobacteriales;f\_Campylobacteraceae;g\_Campylobacter

k\_Bacteria;p\_Proteobacteria;c\_Gammaproteobacteria;o\_Cardiobacteriales;f\_Cardiobacteriaceae;g\_Cardiobacterium

k\_Bacteria;p\_Proteobacteria;c\_Gammaproteobacteria;o\_Legionellales;f\_g\_

k\_Bacteria;p\_Proteobacteria;c\_Gammaproteobacteria;o\_Pasteurellales;f\_Pasteurellaceae;g\_Actinobacillus

k\_Bacteria;p\_Proteobacteria;c\_Gammaproteobacteria;o\_Pasteurellales;f\_Pasteurellaceae;g\_Haemophilus

k\_Bacteria;p\_Proteobacteria;c\_Gammaproteobacteria;o\_Pasteurellales;f\_Pasteurellaceae;g\_Haemophilus

k\_Bacteria;p\_Proteobacteria;c\_Gammaproteobacteria;o\_Pasteurellales;f\_Pasteurellaceae;Other

k\_Bacteria;p\_Proteobacteria;c\_Gammaproteobacteria;o\_Pseudomonadales;f\_Moraxellaceae;g\_

k\_Bacteria;p\_Proteobacteria;c\_Gammaproteobacteria;o\_Pseudomonadales;f\_Moraxellaceae;g\_Acinetobacter

k\_Bacteria;p\_Proteobacteria;c\_Gammaproteobacteria;o\_Pseudomonadales;f\_Moraxellaceae;g\_Moraxella

k\_Bacteria;p\_Proteobacteria;c\_Gammaproteobacteria;o\_Pseudomonadales;f\_Moraxellaceae;Other

k\_Bacteria;p\_Proteobacteria;c\_Gammaproteobacteria;o\_Pseudomonadales;f\_Pseudomonadaceae;g\_Pseudomonas

k\_Bacteria;p\_Proteobacteria;c\_Gammaproteobacteria;o\_Pseudomonadales;f\_Pseudomonadaceae;g\_Pseudomonas

k\_Bacteria;p\_Proteobacteria;c\_Gammaproteobacteria;o\_Xanthomonadales;f\_Sinobacteraceae;g\_

k\_Bacteria;p\_Proteobacteria;c\_Gammaproteobacteria;o\_Xanthomonadales;f\_Xanthomonadaceae;g\_Stenotrophomonas

k\_Bacteria;p\_TM6;c\_SJA-4;o\_f\_g\_

k\_Bacteria;p\_TM7;c\_TM7-3;o\_f\_g\_

k\_Bacteria;p\_TM7;c\_TM7-3;o\_CW040;f\_F16;g\_

k\_Bacteria;p\_WPS-2;c\_o\_f\_g\_
